# Supplementary material for: Homogeneity of liquid metal polymer composites: impact on mechanical, electrical, and sensing behavior
Source: Royal Society of Chemistry journal article supplement (doi:10.1039/d3sm00971h), 2023-01-01
Supplement: d3sm00971h1.pdf [file d3sm00971h1.pdf]

## Supplementary Material

# Homogeneity of Liquid Metal Polymer Composites: Impact on Mechanical, Electrical, and Sensing Behavior

Anh Hoang<sup>1</sup>, Omar Faruqe<sup>2</sup>, Elizabeth Bury<sup>1</sup>, Chanyeop Park<sup>2</sup>, \*Amanda Koh<sup>1</sup>

<sup>1</sup> Chemical and Biological Engineering Department, University of Alabama, Tuscaloosa, AL

<sup>2</sup> Department of Electrical Engineering, University of Wisconsin-Milwaukee, Milwaukee, WI

\* Corresponding Author

Amanda Koh: askoh@eng.ua.edu

3043 H.M. Comer, University of Alabama, Tuscaloosa, AL 35487

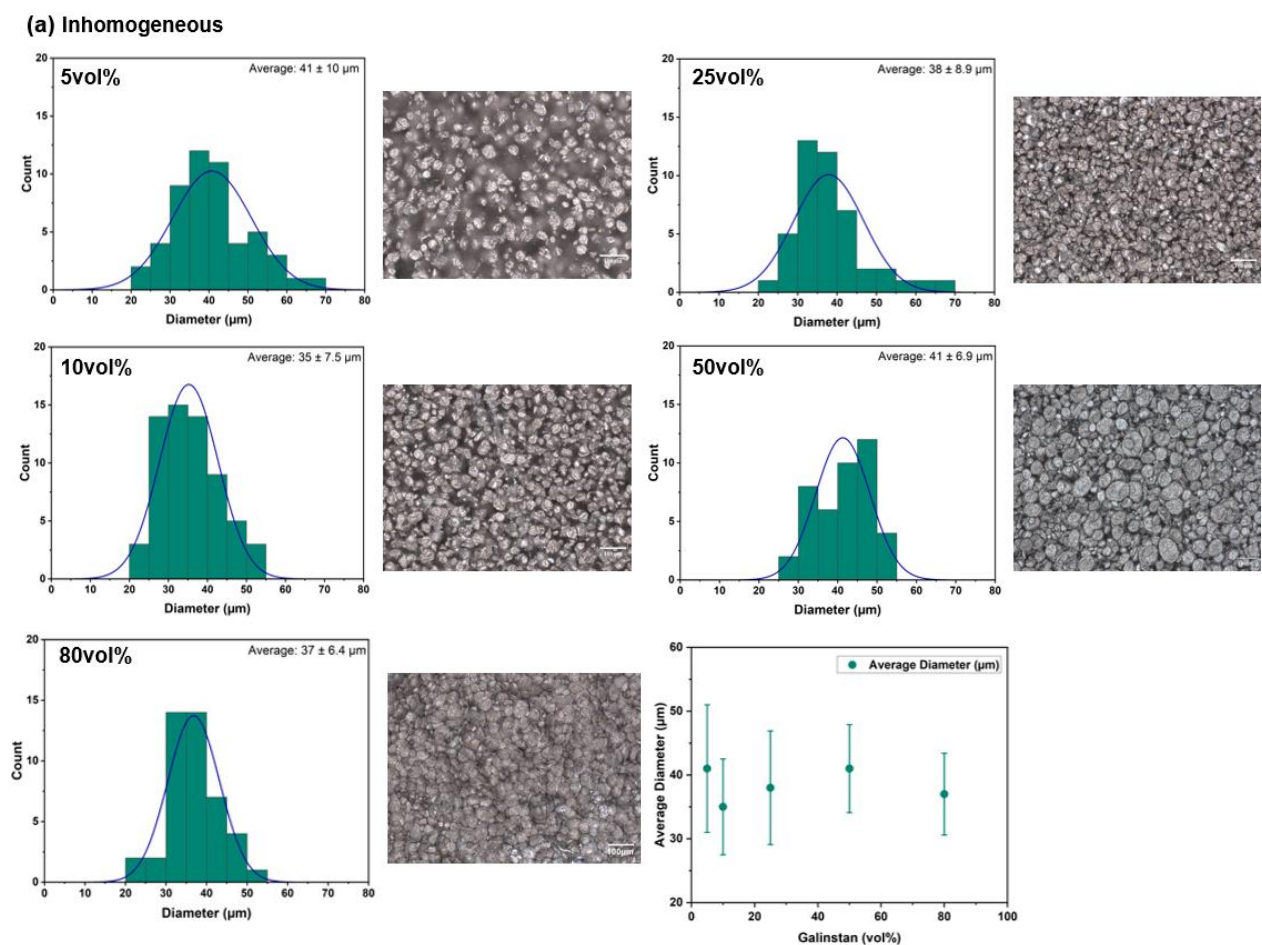

**(b) Homogeneous**

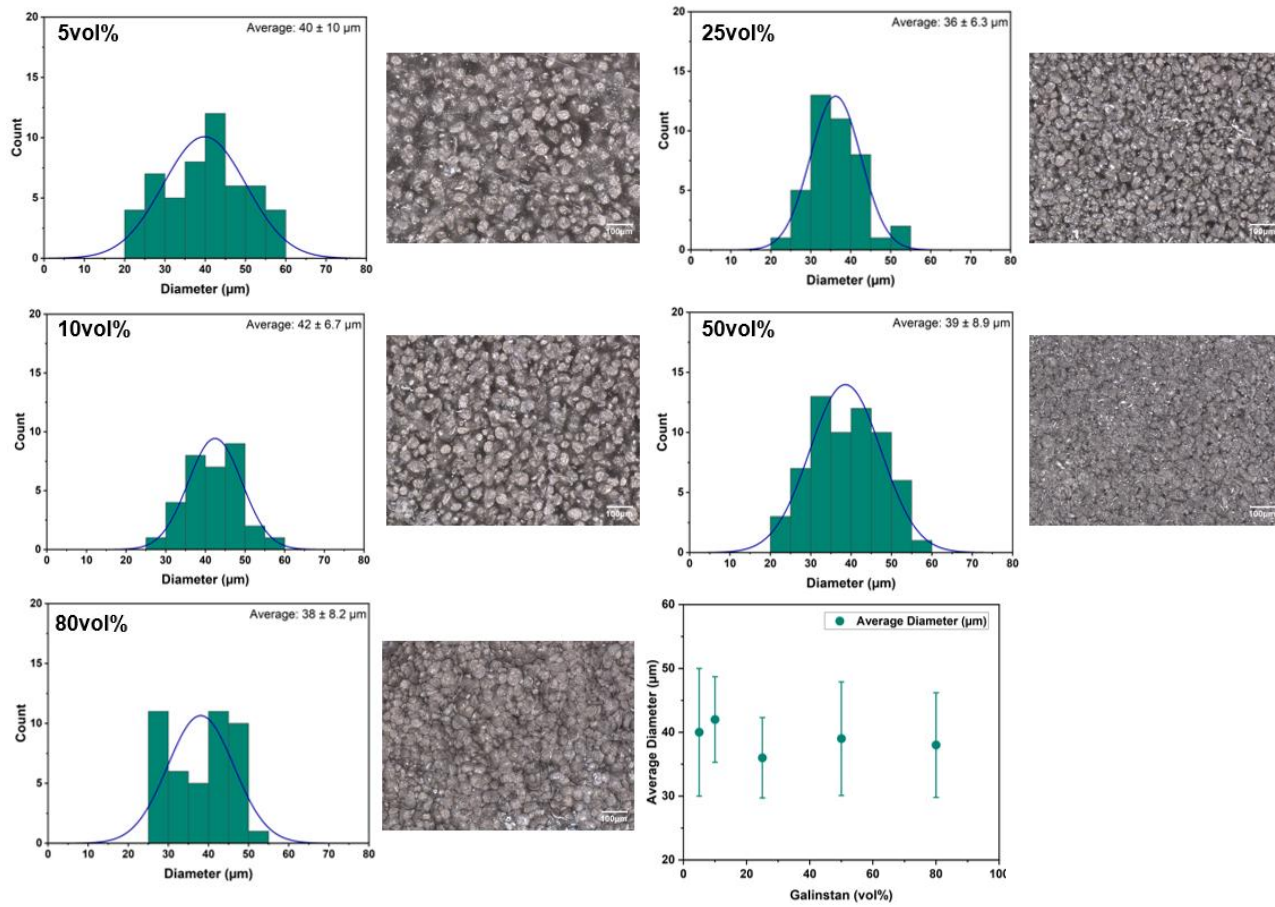

**Figure S1:** Top view digital microscopy images and the average diameter droplet analysis results of (a) inhomogeneous and (b) homogeneous LMPC at 5-80 vol% Galinstan.

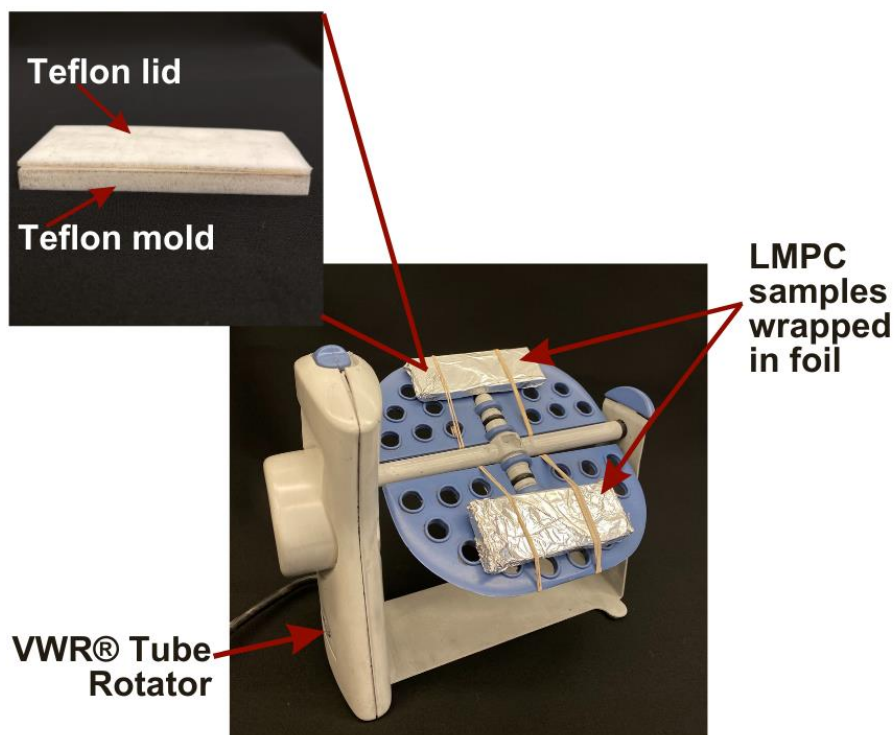

Figure S2. Homogeneous LMPC test setup using the rotator apparatus.

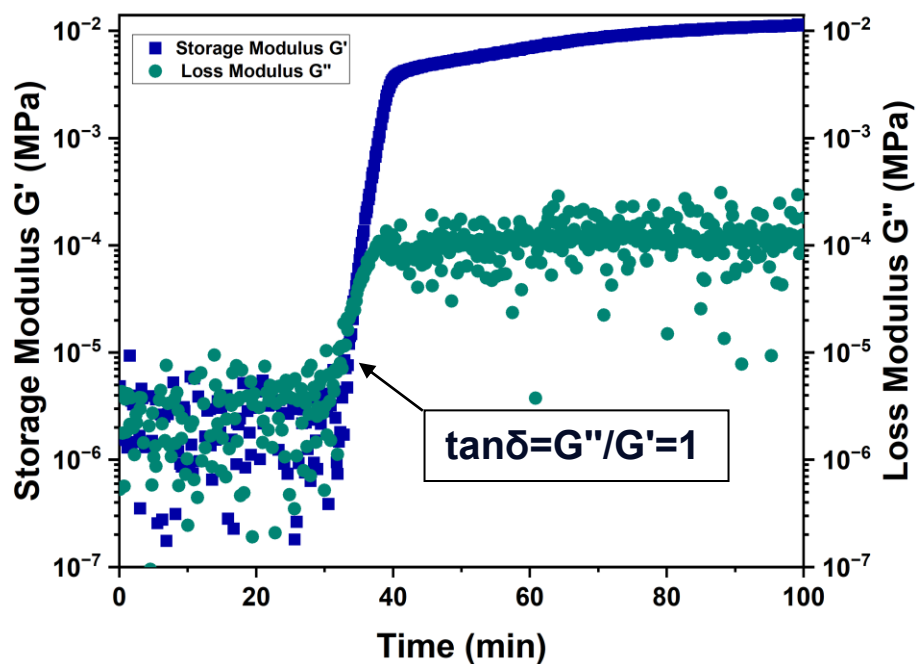

Figure S3. Gelation point, represented by the intersection where  $\tan\delta = 1$ , as measured via rheology.

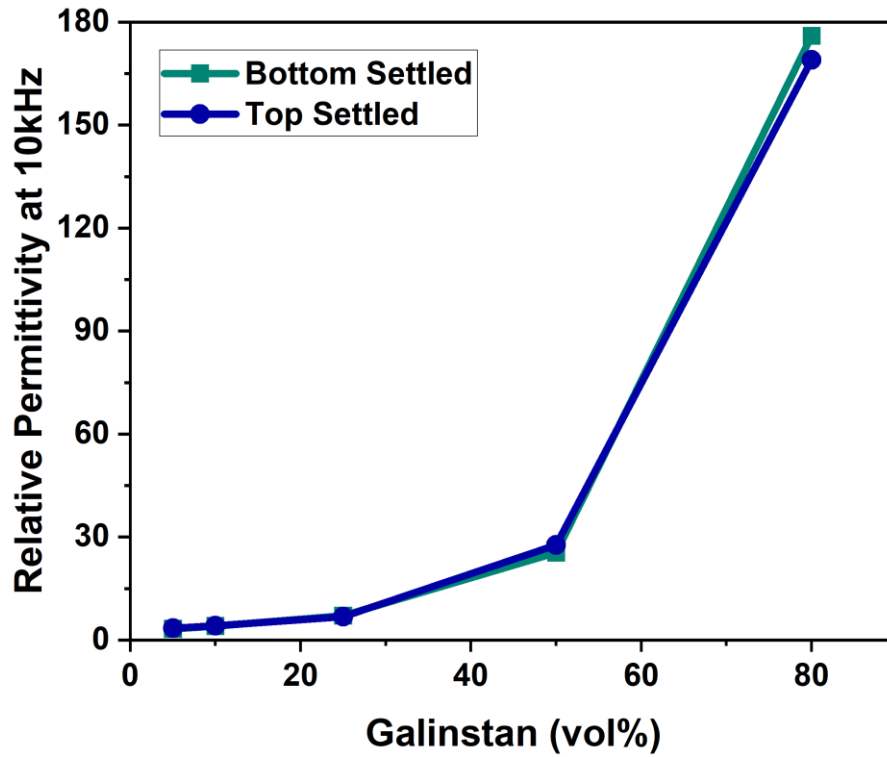

**Figure S4.** Relative permittivity of inhomogeneous LMPCs at 10 kHz with respect to loading of bottom settled and top settled configuration.

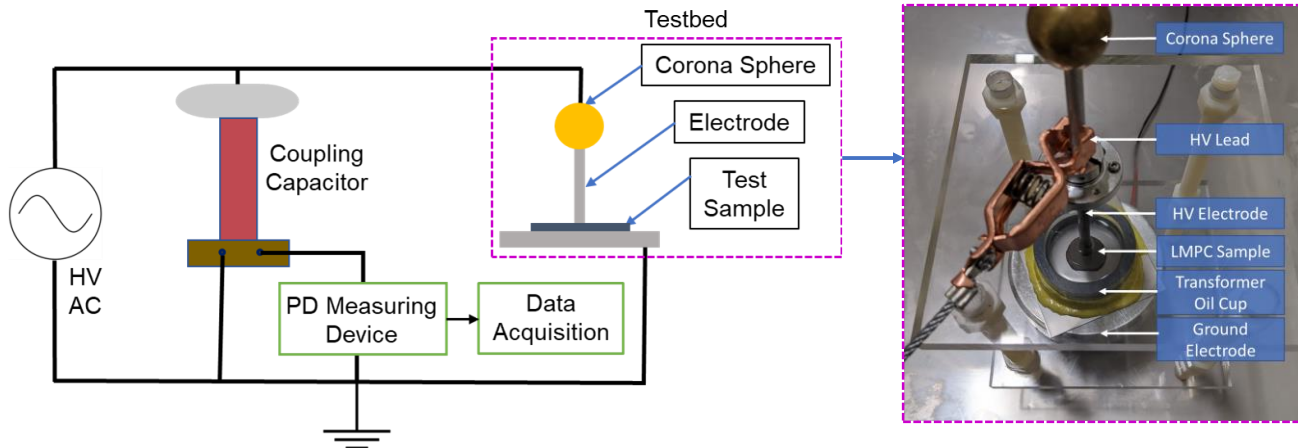

**Figure S5.** Schematic diagram and testbed for AC breakdown and PD measurements.

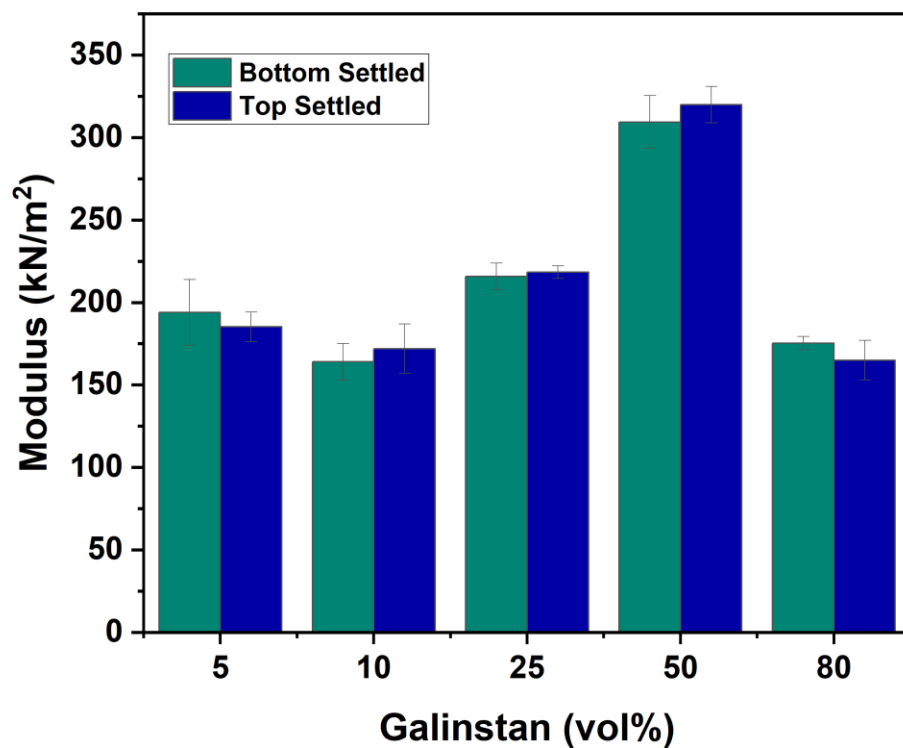

**Figure S6.** Compressive modulus of inhomogeneous LMPCs with respect to loading of bottom settled and top settled configuration.

(a) Inhomogeneous

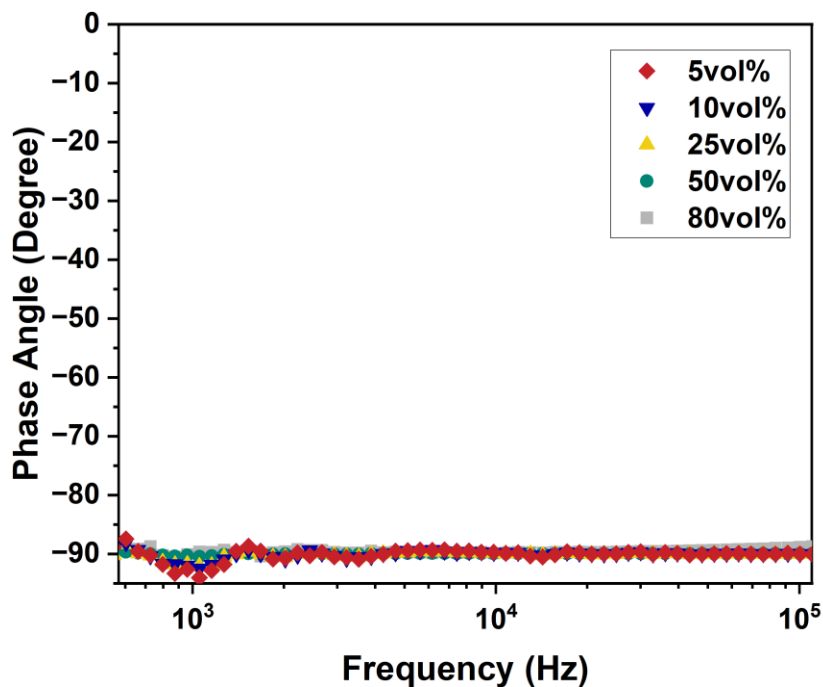

(b) Homogeneous

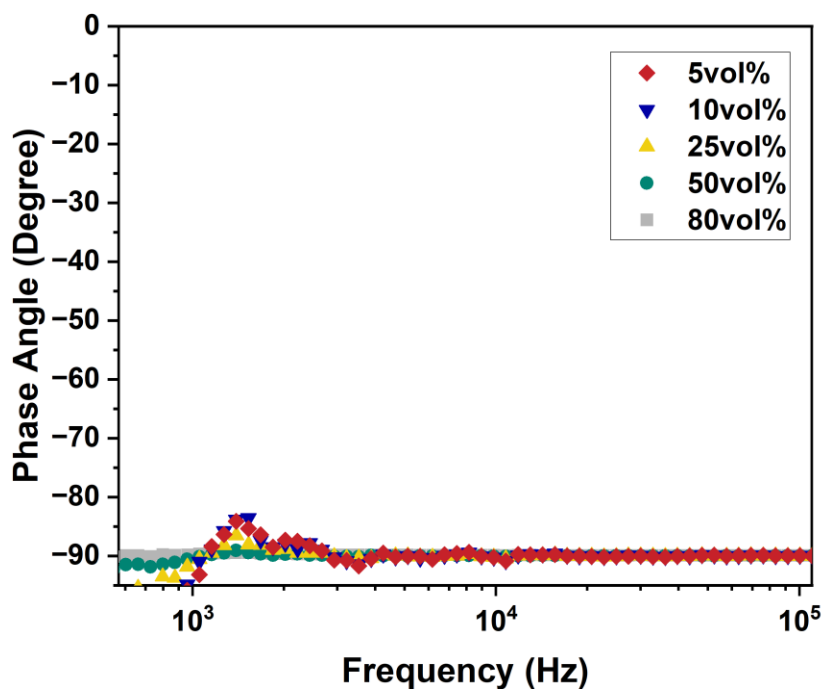

**Figure S7:** Phase angle of (a) inhomogeneous and (b) homogeneous LMPCs with respect to galinstan concentrations.

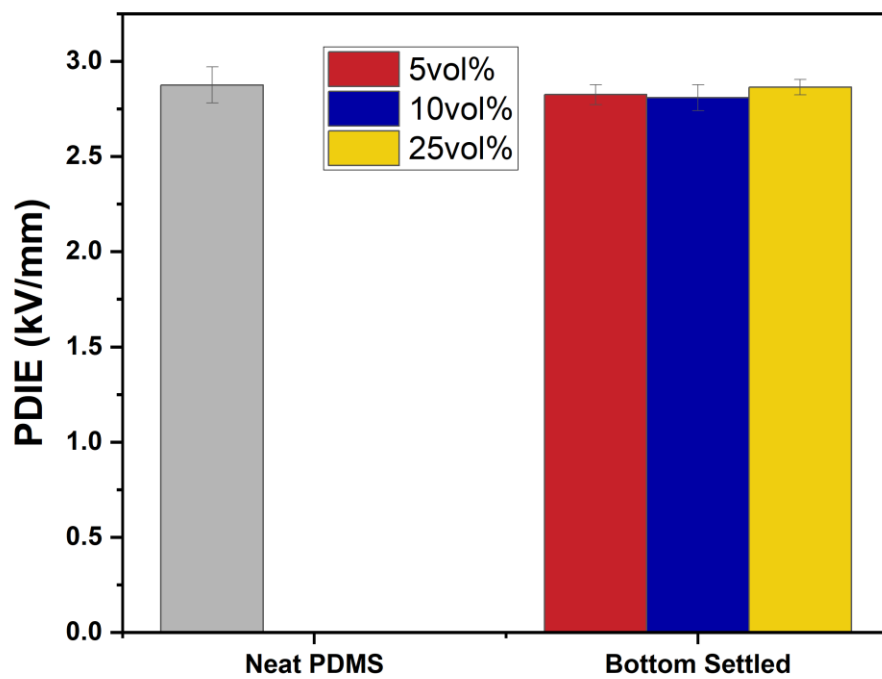

**Figure S8.** PDIE of neat PDMS and bottom settled samples.
